# Supplementary material for: Carbon corrosion in low-temperature CO2 electrolysis systems
Source: Royal Society of Chemistry journal article supplement (doi:10.1039/d4se00594e), 2024-01-01
Supplement: d4se00594e1.pdf [file d4se00594e1.pdf]

## Supplementary Information

# Carbon Corrosion in Low-Temperature CO<sub>2</sub> Electrolysis Systems

Jack R. Ferrell III,<sup>†\*a</sup> Mathew Rasmussen<sup>†a</sup> and W. Wilson McNeary<sup>a</sup>

a. National Renewable Energy Laboratory, 15013 Denver W Pkwy, Golden, CO 80401, USA. E-mail: jack.ferrell@nrel.gov

<sup>†</sup> J. Ferrell and M. Rasmussen contributed equally to this work.

## Supplementary Figures

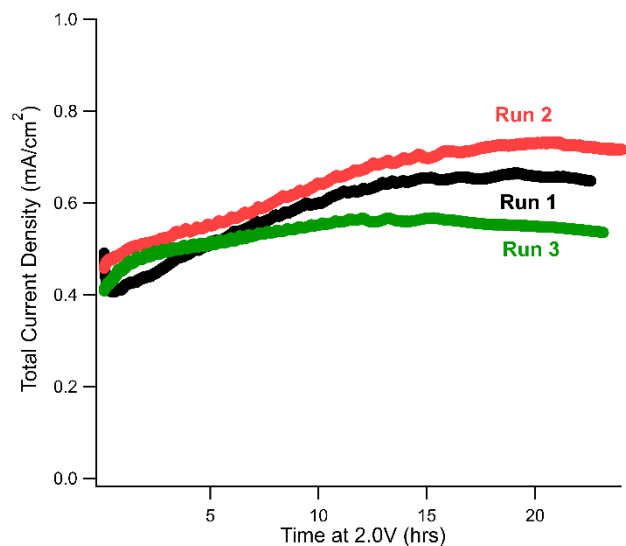

**Figure S1:** Current density measured during replicate carbon corrosion experiments in phosphate electrolyte solution (5mM, pH = 8). Corrosion voltage held at 2.0V (vs Ag/AgCl) for 24hrs.

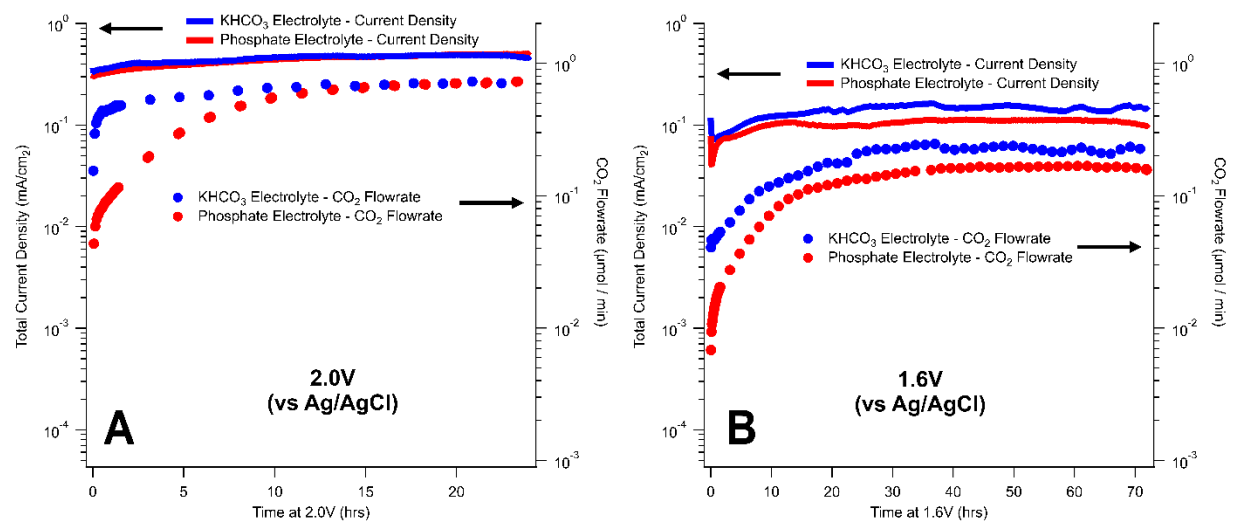

**Figure S2:** Comparison of carbon corrosion rates in phosphate (red) and bicarbonate (blue) electrolyte solutions. Current density (lines, left axis) and CO<sub>2</sub> evolved (dots, right axis) are plotted against time for experiments held at 2.0V vs Ag/AgCl for 24 hrs (A) or 1.6V vs Ag/AgCl for 72hrs (B).

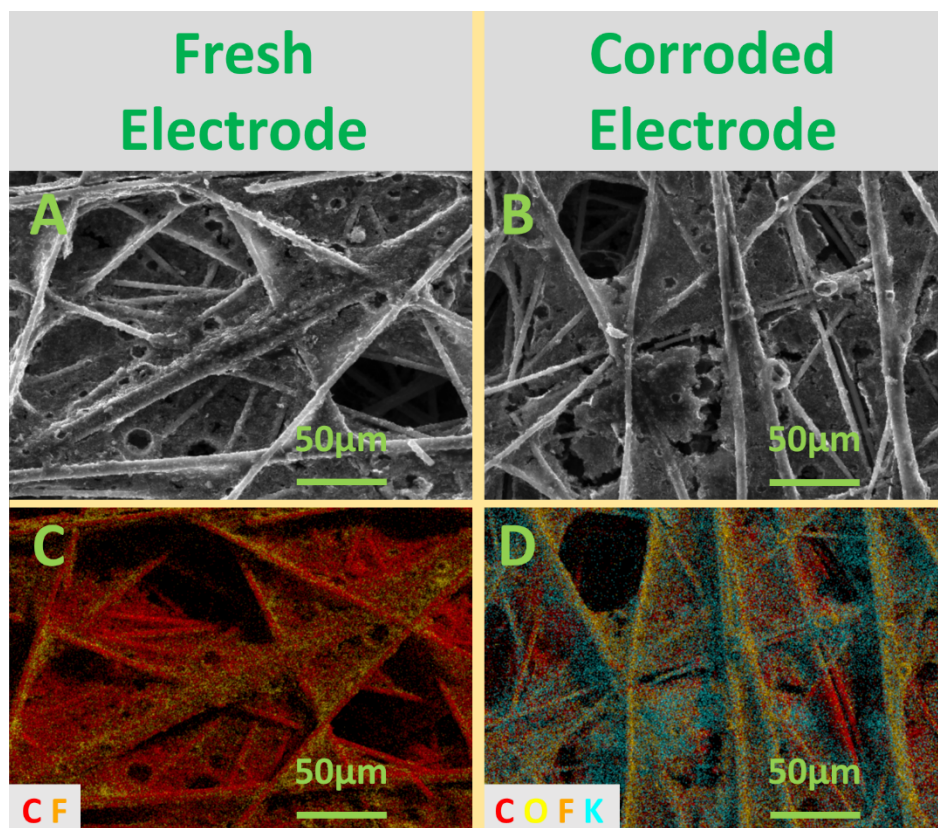

**Figure S3:** SEM images and EDS mapping of a fresh (A, C) and corroded (B, D) AvCarb GDL on the macroporous carbon fiber side. Corrosion conditions were 48hrs at 2.0V vs Ag/AgCl in bicarbonate electrolyte solution. SEM images of the macroporous fiber layer (A, B) are displayed along with the corresponding EDS map (C, D) for those images.

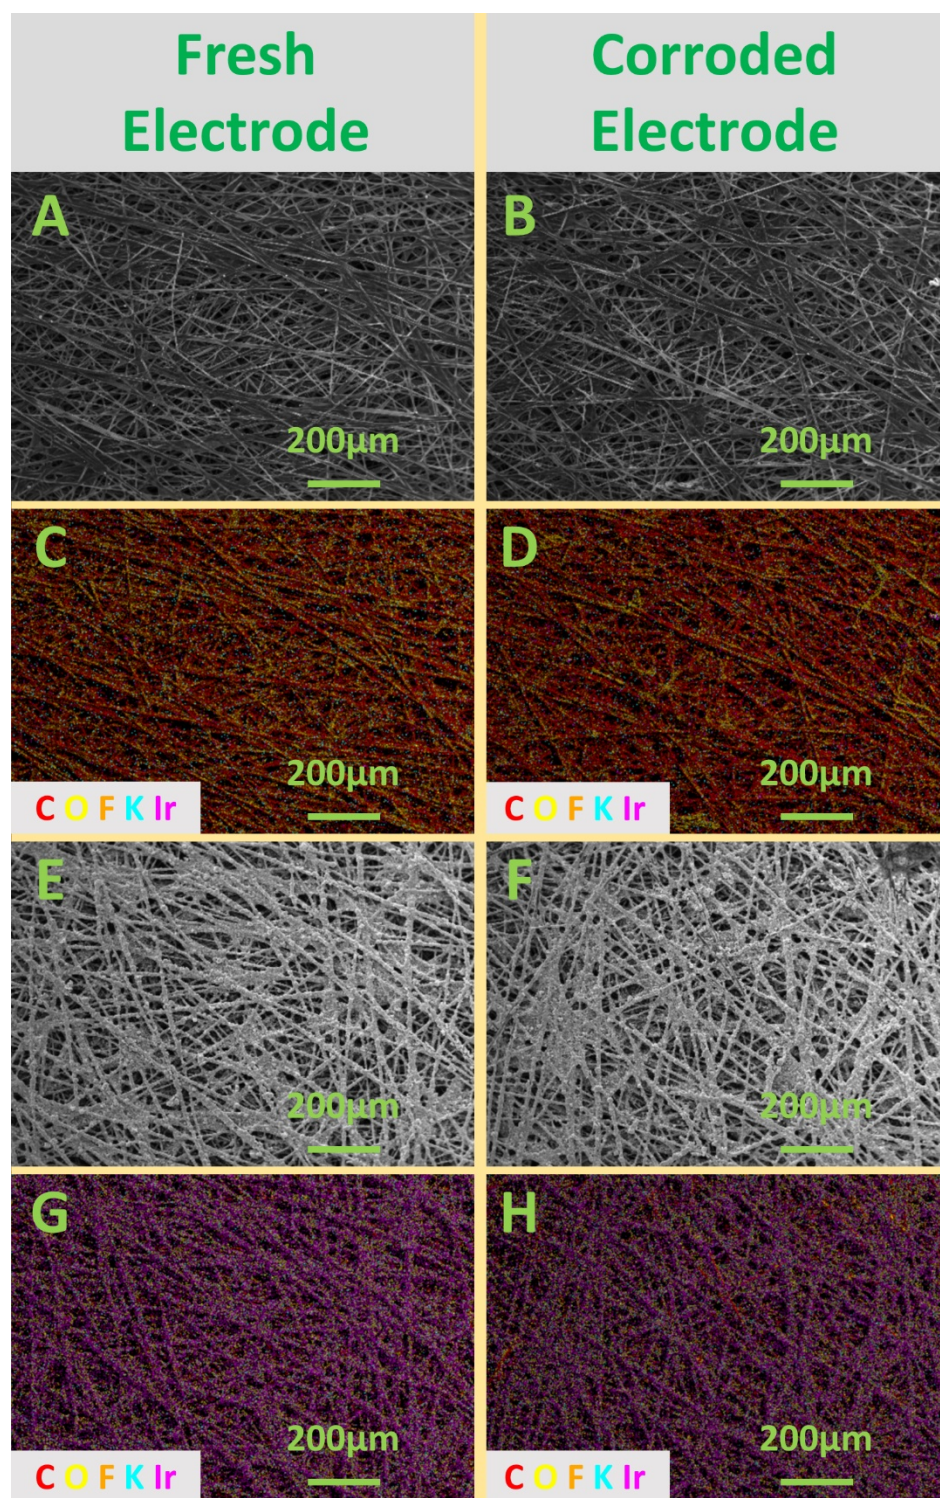

**Figure S4:** SEM images (A, B, E, F) and EDS mapping (C, D, G, H) of a fresh (left) and corroded (right) IrO<sub>2</sub>-coated GDL. Corrosion conditions were 72hrs at 2.0V vs Ag/AgCl in phosphate electrolyte solution. Both the diffusion layer (A, B, C, D) and catalyst layer (E, F, G, H) were imaged and mapped before and after corrosion.

## Supplementary Tables

Table S1 Reported properties of GDLs from various manufacturers.

| Anode Material                 | Reported Thickness ( $\mu\text{m}$ ) | Area Density ( $\text{g}/\text{cm}^2$ ) | CFL PTFE Loading (wt. %) | MPL PTFE Loading (wt. %) | Through-Plane Resistivity ( $\text{m}\Omega\cdot\text{cm}^2$ ) |
|--------------------------------|--------------------------------------|-----------------------------------------|--------------------------|--------------------------|----------------------------------------------------------------|
| AvCarb GDS 5130                | 283                                  | 70                                      | ?                        | ?                        | 11                                                             |
| Sigracet 39BB                  | 315                                  | 95                                      | 5%                       | 20 – 25%                 | <13                                                            |
| Toray Paper (TGP-H-120 w/ MPL) | 430                                  | ~127                                    | 8-9%                     | 33 – 35%                 | ?                                                              |
| TiO <sub>2</sub> Fiber Felt    | 200-300                              | -                                       | -                        | -                        | -                                                              |

Table S2: ICP-OES analysis of fresh and spent electrodes from select corrosion experiments involving IrO<sub>2</sub>-coated and catalyst-free GDLs in phosphate electrolyte.

| Electrode ICP Results |                                    |                      |          |          |        |
|-----------------------|------------------------------------|----------------------|----------|----------|--------|
| Corrosion Conditions  | IrO <sub>2</sub> Coated Electrode? | Concentrations (ppm) |          |          |        |
|                       |                                    | Cu                   | Ir       | K        | P      |
| Fresh Electrode       | No                                 | <250                 | -        | <250     | <250   |
| 2.0V, 24hrs           | No                                 | 109                  | 230.62   | 65612.16 | 603.47 |
| 2.0V, 72hrs           | Yes                                | <20                  | 36834.24 | 19896.34 | 68.82  |
| 1.6V, 168hrs          | Yes                                | 37.4                 | 42449.43 | 20194.23 | 72.47  |

Table S3: ICP-OES analysis of fresh and spent phosphate electrolyte solutions from select corrosion experiments involving IrO<sub>2</sub>-coated and catalyst-free GDLs.

| Electrolyte ICP Results |                                                                     |                      |     |         |        |
|-------------------------|---------------------------------------------------------------------|----------------------|-----|---------|--------|
| Corrosion Conditions    | Electrolyte from Experiment with IrO <sub>2</sub> Coated Electrode? | Concentrations (ppm) |     |         |        |
|                         |                                                                     | Cu                   | Ir  | K       | P      |
| Fresh Electrolyte       | –                                                                   | <20                  | <20 | 1145.76 | 185.88 |
| 2.0V, 24hrs             | No                                                                  | <20                  | <20 | 1023.28 | 187.75 |
| 2.0V, 72hrs             | Yes                                                                 | <20                  | <20 | 1169.75 | 184.55 |
| 1.6V, 168hrs            | Yes                                                                 | <20                  | <20 | 1390.58 | 177.93 |
